# THE AMERICAN JOURNAL OF PSYCHIATRY

---

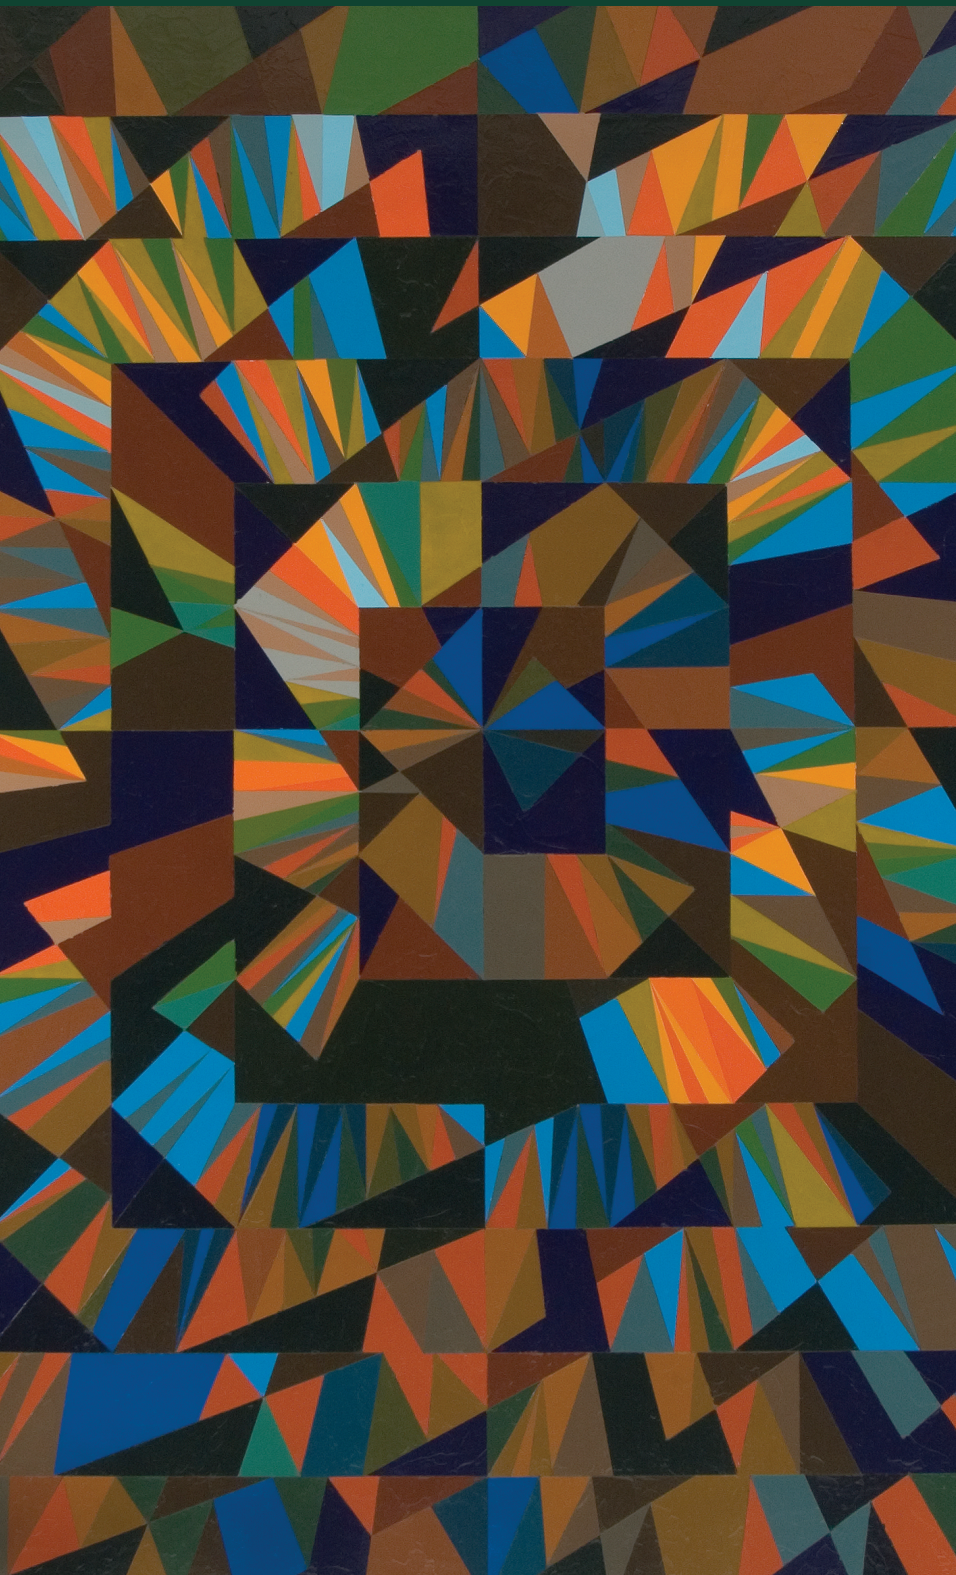

**Treating the Childhood Bipolar  
Controversy: A Tale of Two  
Children**

Gabrielle A. Carlson, M.D. 18

**Placebo Response in Randomized  
Controlled Trials of  
Antidepressants for Pediatric  
Major Depressive Disorder**

Jeffrey A. Bridge, Ph.D., et al. 42

**Psychostimulant Treatment and  
the Developing Cortex in  
Attention Deficit Hyperactivity  
Disorder**

Philip Shaw, M.D., Ph.D., et al. 58

**Psychiatric Disorders and Repeat  
Incarcerations: The Revolving  
Prison Door**

Jacques Baillargeon, Ph.D., et al. 103

**Continuing Medical Education** 123

**January 2009**

**Volume 166 • Number 1**

---

Official Journal of the  
AMERICAN PSYCHIATRIC ASSOCIATION

---

[ajp.psychiatryonline.org](http://ajp.psychiatryonline.org)
