# New Feature for Residents!

## The American Journal of Psychiatry Residents' Journal

A FREE electronic publication produced specifically for psychiatry residents

The Residents' Journal contains special links to full text of the articles from the current *American Journal of Psychiatry* and to AJP Audio, a downloadable MP3 file featuring highlights from the issue. In addition, this e-mail bulletin contains two exclusive features:

### Journal Club Kit

A featured article presented with an overview discussing the reasons for its selection, discussion questions, and an editorial by a senior member of the field placing the article into clinical context.

### Educational Article

Case presentation that illustrates a major point in clinical practice or highlights unique treatment approaches.

Plus lively contributions from your fellow residents:

- Instructive cases
- Unique clinical or educational programs
- Perspectives on training and career development
- Discussions arising from journal club discussions

The American Journal of Psychiatry and the APA Committee of Residents and Fellows

### Residents' Journal

December 2008: Volume 3, Issue 12



The Residents' Journal

Editor-in-Chief: Molly McVoy, M.D.  
Issue Editor: Yavar Moghimi, M.D.  
Staff Editor: Angela Moore

**Contents**  
Medical Anthropology  
Interview With Dr. Arthur Kleinman on Cultural Anthropology and Global Mental Health  
Anna Yuwim 1  
Anthropological Views on the Globalization of PTSD  
Yavar Moghimi 2  
Incarceration and Well-Being  
Justin Sanders 4  
The Effects of Immigrant Status on Mental Healthcare in Latino Communities  
Flavio Casoy 5



The following is an interview with Arthur Kleinman, M.D., on "Cultural Anthropology and Global Mental Health," mediated by Anna Yuwim, M.D. Dr. Kleinman is the Esther and Sidney Rabb Professor and former Department Chair of Harvard University's Department of Anthropology. Dr. Kleinman is also Professor and former Department Chair of Harvard Medical School's Department of Social Medicine. As one of the international community's leading medical anthropologists, Dr. Kleinman directed the 2001 World Mental Health Report. Dr. Yuwim is a third-year Adult Psychiatry Resident at NYU and one of the Deputy Editors for the Residents' Journal.

**Dr. Yuwim:** You chose to pursue a career that combines medicine and anthropology at a time when these two fields were considered disparate entities. How did you make this decision?

**Dr. Kleinman:** After completing my internal medicine internship at Yale during the Vietnam War, I became a Clinical Fellow at the NIH Institute of Allergy and Infectious Diseases. Thus, I began my medical career making not psychiatric disease but (spiro) and tuberculosis. Because my wife knew Chinese, I was sent as a public health service officer to the Navy medical research unit in Taiwan, where I was immediately impressed with the stigma associated with infectious diseases. In looking at stigma, it was impossible to realize how large a role history and culture played in determining which diseases were stigmatized, which carried less stigma, and which were even in some way "glamorous" to have, like tuberculosis, which at the time was thought of as deepening people's sensibilities and thus bringing them closer to the romantic notion of ineffability and the transitory nature of life. After that experience, I went to Harvard and studied anthropology because I wanted a systematic way to understand the social consequences of illness. I chose to study psychiatry because it was the most humanistic of the medical disciplines and, by focusing on the anxiety/depression associated with medical disorders, would enable me to combine anthropology with a medical specialty.

**Dr. Yuwim:** In your career, you basically defined the entire field of medical anthropology. How did you go about doing this, and what are some of the fundamental tenets of this field?

**Dr. Kleinman:** The medical and academic world was very different when I trained. In the middle of my residency, I was awarded a wonderful fellowship that allowed me to spend part of my time during my residency on research and writing and after my residency ended to go back to the field (Taiwan) for 1 year. This really supported my intellectual life. In the middle of all this, I published four articles and wrote my first book, which ended up defining my career. One article was on the central role of meanings in medicine. The second was an attempt to lay out a model for comparing healthcare systems around the world. The third compared the different forms of medical care around the world, like biomedical care and religious and folk ways of healing. The fourth article was related to the history of public health in China. Then I wrote my first book, *Patient and Healer in the Castles of Calcutta*. It basically says that public health is entirely wrong. If you really want to know what healthcare in society is like, you need to begin with the individuals who are sick. You need to examine the decisions they make, the ideas they have, and the ways in which they choose to navigate the different arenas of healthcare. In one of my empirical studies, I showed that around 75% of illness episodes in China never left the family network. People never went to any doctor or folk healer at all. This was an area even anthropology was not studying. The book took off and defined the entire field of medical anthropology. I had the phenomenon—that is different from most people—of having my greatest audience at the start of my career. Part of that was because there was a wave of interest gathering in this area, and somebody had to define it.

**Dr. Yuwim:** A topic about which you have written extensively is the pathologizing of normal human experience. I was really struck by your quote in your book, *Was Really Matters*:

The Residents' Journal is sent free-of-charge to all psychiatry residents. Anyone interested in being included on the distribution list should contact Angela Moore, the Residents' Journal staff editor at [ajp@psych.org](mailto:ajp@psych.org) with "Subscribe to Residents' Journal" in the subject line.

# Read *The American Journal of Psychiatry* Online

Activate your FREE online access—It's as easy as 1, 2, 3!

To begin activation, go to [ajp.psychiatryonline.org](http://ajp.psychiatryonline.org) and click **SUBSCRIBE**

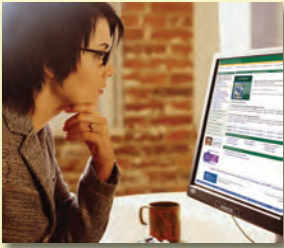

## For APA Members and Other Individuals:

1. Click on **ACTIVATE Your Member or Individual (Non-Member) Subscription**
2. Locate your 10-digit Member/Customer Number\* on your journal mailing label above your name. Be sure to enter all 10 digits, including any leading zeros.
3. Enter your number in the box and click **SUBMIT**.

On the next screen, you'll register your subscription and create a username and password that can be used immediately to access your online subscription.

\*If you are an APA Member, in most cases the number on your label will be your Member Number; if it is not, please enter your APA Member Number (with enough leading zeros to create 10 digits) instead of the number on your mailing label.

## For Institutions:

1. Click on **ACTIVATE Your Institutional Subscription**.
2. Locate your Customer Number on the journal mailing label above your name. Be sure to enter all 10-digits.
3. Enter your number in the box and click **SUBMIT**. On the next screen, you'll have the opportunity to enter IP addresses for your institution to provide seamless access for your patrons.

### Member/Customer Number

AJP3000056866 CAR-RT LOT88 C-015  
John Q. Sample  
Mental Health Professional  
1000 Wilson Blvd STE 1825  
Arlington VA 22209-3924 01654

## Benefits of Online Activation

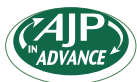

**AJP in Advance**—key research articles posted on the AJP website well in advance of their appearance in print.

**Back issue access to Volume 1, Issue 1**, starting with the *American Journal of Insanity* in 1844. (Available to institutions as a separate one-time purchase.)

**AJP CME**—interactive quizzes that offer *AMA PRA Category 1 Credits™* for selected articles from each issue (with paid subscription to the CME Course Program).

**AJP Audio**—MP3-format program summarizing findings from key articles from each issue.

**Residents' Journal**—the gateway to AJP articles and features that have most value to residents in their training.

**Precise and powerful searching** by author, keyword, and/or citation details—within any one journal, across the entire PsychiatryOnline journal collection, or across all HighWire journals.

**PubMed, CrossRef, and Google Scholar links**—from cited references to abstracts and full text; to similar articles; to other articles by the same lead authors.

**eTOCs**—Get advance email alerts with the table of contents from the latest issue.

For more information or if you cannot locate your customer number, please contact APPI Customer Service:  
Call: 1.800.368.5777 or 703.907.7322  
Email: [appi@psych.org](mailto:appi@psych.org)

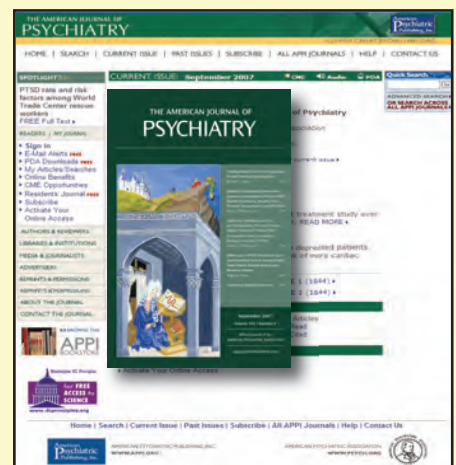

American  
**Psychiatric**  
Publishing, Inc.

The First and Last Word in Psychiatry

AH810

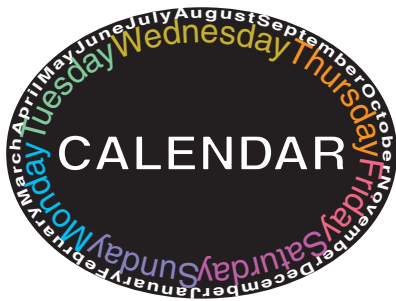

For free listing of your organization's official annual or regional meeting, please send us the following information: sponsor, location, inclusive dates, type and number of continuing education credits (if available), and the name, address, and telephone number of the person or group to contact for more information. In order for an event to appear in our listing, all notices and changes must be received at least 6 months in advance of the meeting and should be addressed to:

*Calendar, American Journal of Psychiatry, 1000 Wilson Boulevard, Suite 1825, Arlington, VA 22209-3901, jblair@psych.org (e-mail).*

*Because of space limitations, only listings of meetings of the greatest interest to Journal readers will be included.*

## FEBRUARY 2009

**February 18–22**, Annual Meeting of the American Neuropsychiatric Association (ANPA), San Antonio, TX. Contact: ANPA office; (614) 447-2077 (tel), (614) 263-4366 (fax), [anpa@osu.edu](mailto:anpa@osu.edu) (e-mail), [www.anpaonline.org](http://www.anpaonline.org) (web site).

**February 25–March 1**, American College of Psychiatrists Annual Meeting, Tucson, AZ. Contact: 122 South Michigan Avenue, Suite 1360, Chicago, IL 60603; (312) 662-1020 (tel), (312) 662-1025 (fax), [angel@ACPsych.org](mailto:angel@ACPsych.org) (e-mail).

## MARCH

**March 5–8**, 22nd Annual Meeting of the American Association for Geriatric Psychiatry, Honolulu. Contact: AAGP, 7910 Woodmont Ave., Ste. 1050, Bethesda, MD 20814-3004; (301) 654-7850 (tel), (301) 654-4137 (fax), [www.aagpmeeting.org](http://www.aagpmeeting.org) (web site).

**March 27–29**, 3rd International Conference of The International Society of Interpersonal Psychotherapy (ISIPT), New York City, NY. Contact: 2009 ISIPT Planning Committee; [hv2009@columbia.edu](mailto:hv2009@columbia.edu) (e-mail).

## APRIL

**April 22–26**, Annual Meeting and Scientific Sessions of the Society of Behavioral Medicine, Montreal, Quebec. Contact: Society of Behavioral Medicine, (414) 918-3156 (tel), (414) 276-3349 (fax), [info@sbm.org](mailto:info@sbm.org) (e-mail).

## MAY

**May 14–17**, The 53rd Annual Meeting of the American Academy of Psychoanalysis and Dynamic Psychiatry, San Francisco, CA. Contact: Executive Office, Amer-

ican Academy of Psychoanalysis and Dynamic Psychiatry, P. O. Box 30, Bloomfield, CT 06002; (888) 691-8281 (tel), (860) 286-0787 (fax), [info@aapdp.org](mailto:info@aapdp.org) (e-mail), [www.aapdp.org](http://www.aapdp.org) (web site).

**May 15–17**, 5th International Conference on Alzheimer's Disease and Related Disorders in the Middle East, Limassol, Cyprus. Contact: Conference Secretariat; 1-773-784-8134 (tel), 1-773-782-6747 (tel), 1-208-575-5453 (fax), [meetings@worldeventsforum.com](mailto:meetings@worldeventsforum.com) (e-mail), [www.worldeventsforum.com/alz.htm](http://www.worldeventsforum.com/alz.htm) (web site).

**May 16–21**, 162nd Annual Meeting of the American Psychiatric Association, San Francisco, CA. Contact: Cathy Nash, APA Annual Meetings Dept., 1000 Wilson Blvd., Ste. 1825, Arlington, VA 22209; (703) 907-7822.

## JUNE

**June 16–20**, 2nd Thematic Conference on Legal and Forensic Psychiatry, Madrid, Spain. Contact: World Psychiatric Association, Alfredo Calcedo Barba, [forensicpsychiatry2009@gmail.com](mailto:forensicpsychiatry2009@gmail.com).

## AUGUST

**August 27–30**, Canadian Psychiatric Association 59th Annual Meeting, St. Johns, Newfoundland, Canada. Contact: 260-441 MacLaren Street, Ottawa, ON K2P 2H3, Canada; (800) 267-1555 (tel), (613) 234-9857 (fax), [conferene@cpa-apc.org](mailto:conferene@cpa-apc.org) (e-mail), [www.cpa-apc.org](http://www.cpa-apc.org) (web site).

## OCTOBER

**October 8–11**, 61st Institute on Psychiatric Services, American Psychiatric Association, New York, NY. Contact: Jill Gruber, APA Annual Meetings Dept., 1000

Wilson Blvd., Ste. 1825, Arlington, VA 22209; (703) 907-7815.

**October 27–November 1**, 56th Annual Meeting of the American Academy of Child and Adolescent Psychiatry, Honolulu, HI. Contact: AACAP, 3615 Wisconsin Avenue, N.W., Washington, DC 20016-3007; (202) 966-7300 (tel), (202) 966-2891 (fax), [meetings@aacap.org](mailto:meetings@aacap.org) (e-mail), [www.aacap.org](http://www.aacap.org) (web site).

## MAY 2010

**May 22–27**, 163rd Annual Meeting of the American Psychiatric Association, New Orleans, LA. Contact: Cathy Nash, APA Annual Meetings Dept., 1000 Wilson Blvd., Ste. 1825, Arlington, VA 22209; (703) 907-7822.

## OCTOBER

**October 14–17**, 62nd Institute on Psychiatric Services, American Psychiatric Association, Boston, MA. Contact: Jill Gruber, APA Annual Meetings Dept., 1000 Wilson Blvd., Ste. 1825, Arlington, VA 22209; (703) 907-7815.

## OCTOBER

**October 14–17**, 57th Annual Meeting of the American Academy of Child and Adolescent Psychiatry, Boston, MA. Contact: AACAP, 3615 Wisconsin Avenue, N.W., Washington, DC 20016-3007; (202) 966-7300 (tel), (202) 966-2891 (fax), [meetings@aacap.org](mailto:meetings@aacap.org) (e-mail), [www.aacap.org](http://www.aacap.org) (web site).

## MAY 2011

**May 14–19**, 164th Annual Meeting of the American Psychiatric Association, Honolulu, HI. Contact: Cathy Nash, APA Annual Meetings Dept., 1000 Wilson Blvd.,

*Continued on page A16*

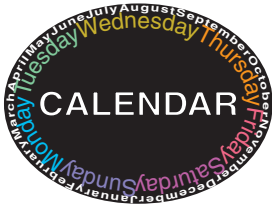

Continued from page A14

Ste. 1825, Arlington, VA 22209; (703) 907-7822.

## OCTOBER

**October 18–23**, 58th Annual Meeting of the American Academy of Child and Adolescent Psychiatry, Toronto, Ontario. Contact: AACAP, 3615 Wisconsin Avenue, N.W., Washington, DC 20016-3007; (202) 966-7300 (tel), (202) 966-2891 (fax), meetings@aacap.org (e-mail), www.aacap.org (web site).

## Continuing Medical Education

Three articles in each issue provide an opportunity to earn up to 1 hour category 1 **CME** credit each by taking a course covering the content. Credit available online only with purchased subscription to AJP's CME program. Visit [cme.psychiatryonline.org](http://cme.psychiatryonline.org) for details.

## FREE AUDIO! Have You Heard?

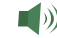

You can listen to highlights of *The American Journal of Psychiatry* by downloading a monthly free .mp3 audio file from our website (<http://ajp.psychiatryonline.org/misc/audio.dtl>) or by subscribing to the AJP Audio podcast at iTunes or other feed reader.

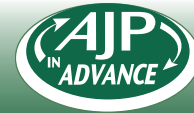

## GET AHEAD!

Subscribers can now view PDFs of all new research articles before print publication by clicking on the "AJP in Advance" logo at the AJP website ([ajp.psychiatryonline.org](http://ajp.psychiatryonline.org)).

## Coming in the February 2009 issue\*

### THE AMERICAN JOURNAL OF PSYCHIATRY

#### *Correlates of Treatment-Emergent Mania Associated With Antidepressant Treatment in Bipolar Depression*

M.A. Frye, G. Helleman, S.L. McElroy, L.L. Altshuler, D.O. Black, P.E. Keck, Jr.,  
W.A. Nolen, R. Kupka, G.S. Leverich, H. Grunze, J. Mintz, R.M. Post, and T. Suppes

#### *Manic Symptoms During Depressive Episodes in 1,380 Patients With Bipolar Disorder: Findings From the STEP-BD*

J.F. Goldberg, R.H. Perlis, C.L. Bowden, M.E. Thase, D.J. Miklowitz,  
L.B. Marangell, J.R. Calabrese, A.A. Nierenberg, and G.S. Sachs

#### *Older Adults' Attitudes Toward Enrollment of Non-competent Subjects Participating in Alzheimer's Research*

J. Karlawish, J. Rubright, D. Casarett, M. Cary, T. Ten Have, and P. Sankar

#### *Neuropsychological Near Normality and Brain Structure Abnormality in Schizophrenia*

B.E. Wexler, H. Zhu, M.D. Bell, S.S. Nicholls, R.K. Fulbright,  
J.C. Gore, T. Colibazzi, J. Amat, R. Bansal, and B.S. Peterson

\*Can't wait? Visit [ajp.psychiatryonline.org](http://ajp.psychiatryonline.org) and click the "AJP in Advance" logo to see all articles uploaded in advance of print!

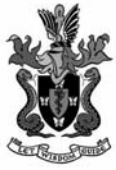

# THE BRITISH JOURNAL OF PSYCHIATRY

December 2008, VOL. 193

A20 Editorial Board

A22 Highlights of this issue

## Editorial

435 **Grief and acceptance as opposite sides of the same coin: setting a research agenda to study peaceful acceptance of loss**  
H.G. Prigerson and P.K. Maciejewski

## Review article

438 **Interventions for people bereaved through suicide: systematic review**  
C. McDaid, R. Trowman, S. Golder, K. Hawton, and A. Sowden

## Papers

444 **Abortion and mental health disorders: evidence from a 30-year longitudinal study**  
D.M. Fergusson, L.J. Horwood, and J.M. Boden

452 **Invited commentaries on . . . Abortion and mental health disorders**  
P. Casey / M. Oates, I. Jones, and R. Cantwell

455 **Pregnancy loss and psychiatric disorders in young women: an Australian birth cohort study**  
K. Dingle, R. Alati, A. Clavarino, J.M. Najman, and G. Williams

461 **IQ in early adulthood and later risk of death by homicide: cohort study of 1 million men**  
G.D. Batty, I.J. Deary, A. Tengstrom, and F. Rasmussen

465 **Hysteria—in 100 words**  
Harold Merskey

466 **Behavioural phenotype of Cornelia de Lange syndrome: case-control study**  
C. Oliver, K. Arron, J. Sloneem and S. Hall

471 **Immigrants and borderline personality disorder at a psychiatric emergency service**  
J.C. Pascual, A. Malagón, D. Córcoles, J.M. Ginés, J. Soler, C. García-Ribera, V. Pérez, and A. Bulbena

477 **Early intervention for adolescents with borderline personality disorder using cognitive analytic therapy: randomised controlled trial**  
A.M. Chanen, H.J. Jackson, L.K. McCutcheon, M. Jovev, P. Dudgeon, H.P. Yuen, D. Germano, H. Nistico,

E. McDougall, C. Weinstein, V. Clarkson, and P.D. McGorry

484 **Mark Rothko—psychiatry in pictures**  
Alexandra Pitman

485 **Olzapine for the treatment of borderline personality disorder: variable dose 12-week randomised double-blind placebo-controlled study**  
S.C. Schulz, M.C. Zanarini, A. Bateman, M. Bohus, H. C. Detke, Q. Trzaskoma, Y. Tanaka, D. Lin, W. Deberdt, and S. Corya

493 **Randomised controlled trial of CD-ROM-based cognitive-behavioural self-care for bulimia nervosa**  
U. Schmidt, M. Andiappan, M. Grover, S. Robinson, S. Perkins, O. Dugmore, S. Landau, J. Treasure, I. Eisler, and C. Williams

500 **Phasianus Colchicus—poems by doctors**  
Stephen Wilson

## Short reports

501 **Adults with untreated phenylketonuria: out of sight, out of mind**  
G.H. Murphy, S.M. Johnson, A. Amos, E. Weetch, R. Hoskin, B. Fitzgerald, M. Lilburn, L. Robertson, and P. Lee

503 **General hospital presentations of non-fatal hanging over a 28-year period: case-control study**  
K. Hawton, H. Bergen, D. Casey, and S. Simkin

505 **Cognitive-behavioural therapy v. usual care in recurrent depression**  
H.J. Conradi, P. de Jonge, and J. Ormel

## Columns

507 Correspondence

518 Book reviews

521 Contents of *Advances in Psychiatric Treatment*

522 Books received

523 Contents of the *American Journal of Psychiatry*

524 From the Editor's desk
